# Supplementary material for: Proline codon pair selection determines ribosome pausing strength and translation efficiency in bacteria
Source: PubMed Central journal article supplement (PMC8129111; doi:10.1038/s42003-021-02115-z), 2021-05-17
Supplement: 42003_2021_2115_MOESM2_ESM.pdf [file 42003_2021_2115_MOESM2_ESM.pdf]

## Description of Additional Supplementary Files

**File name:** Supplementary Data S1

**Description:** Oligonucleotides used during this study.

**File name:** Supplementary Data S2

**Description:** Plasmids used and generated during this study.

**File name:** Supplementary Data S3

**Description:** Strains used and generated during this study.

**File name:** Supplementary Data S4

**Description:** Bacterial genomes used for bioinformatic analysis.

**File name:** Supplementary Data S5

**Description:** Codon choice at di- and triprolyl motifs in *E. coli*

**File name:** Supplementary Data S6

**Description:** Source data underlying graphs presented in this study.
